# Supplementary material for: Constructing oxygen vacancies by doping Mo into spinel Co3O4 to trigger a fast oxide path mechanism for acidic oxygen evolution reaction
Source: Royal Society of Chemistry journal article supplement (doi:10.1039/d4ta00655k), 2024-01-01
Supplement: d4ta00655k1.pdf [file d4ta00655k1.pdf]

## Electronic Supplementary Information (ESI) for

# Constructing oxygen vacancies by doping Mo into spinel $\text{Co}_3\text{O}_4$ to trigger fast oxide path mechanism for acidic oxygen evolution reaction

*Lang Sun, Min Feng, Yang Peng, Xu Zhao, Yiqun Shao, Xin Yue\* and Shaoming Huang\**

Guangzhou Key Laboratory of Low-Dimensional Materials and Energy Storage Devices, Collaborative Innovation Center of Advanced Energy Materials, School of Materials and Energy, Guangdong University of Technology, Guangzhou, 510006, P. R. China.

E-mail: xinyue@gdut.edu.cn (X. Y.); smhuang@gdut.edu.cn (S. H.).

### **Experimental Section**

#### **Synthesis**

*Chemicals:* Cobalt nitrate hexahydrate ( $\text{Co}(\text{NO}_3)_2 \cdot 6\text{H}_2\text{O}$ , AR), ammonium molybdate tetrahydrate ( $(\text{NH}_4)_6\text{Mo}_7\text{O}_{24} \cdot 4\text{H}_2\text{O}$ , AR) and sodium hydroxide (NaOH, AR) were purchased from Shanghai Macklin Biochemical Co., Ltd. Hydrochloric acid (HCl, AR) was purchased from Chengdu Cologne Chemical Co., Ltd. Ethanol ( $\text{C}_2\text{H}_6\text{O}$ , AR) was purchased from Tianjin Chemo Chemical Reagent Co., Ltd. Deionized (DI) water was homemade. Carbon paper (CP) was purchased from Hubei Rocktech Instrument Co., Ltd.

*Synthesis of Mo-doped oxygen vacancies enriched  $\text{Co}_3\text{O}_4$  ( $V_{\text{O}}\text{-Mo}_x\text{Co}_{3-x}\text{O}_4$ ):* Firstly, NaOH was dissolved in 50 mL of deionized water until the pH value was adjusted to 12. Secondly,  $\text{Co}(\text{NO}_3)_2 \cdot 6\text{H}_2\text{O}$  (0.100 mmol) and  $(\text{NH}_4)_6\text{Mo}_7\text{O}_{24} \cdot 4\text{H}_2\text{O}$  (0.400 mmol) were dissolved into 50 mL of the resulting solution and stirred for 60 min. Then, the resulting mixture was transferred into a polytetrafluoroethylene-lined autoclave (100

mL), Subsequently, it was heat treated in an electric oven for 6 h at 180 °C. After cooling to room temperature, the resulting product was washed six times with deionized water and ethanol, followed by drying in a vacuum oven at 60 °C for 24 h. Finally, the resulting product was annealed in an air atmosphere at 300 °C for 2 h.

*Synthesis of pure Co<sub>3</sub>O<sub>4</sub>:* The synthesis process was the same as V<sub>O</sub>-Mo<sub>X</sub>Co<sub>3-X</sub>O<sub>4</sub>, except that no precursor of Mo was used.

### **Electrochemical measurement**

For electrochemical measurement, the electrocatalyst was dispersed in 0.9 mL ethanol + 0.1 mL Nafion (0.5 wt%, DuPont) mixture by ultrasonic treating 24 h to form a well-dispersed catalyst ink and then it was drop-coated onto a carbon paper (CP, 1 cm × 1 cm) electrode for testing. All electrochemical measurements were performed on an Autolab PGSTAT204 electrochemical constant potential meter. The electrochemical measurements were carried out in a typical three-electrode system, with a graphite rod as the counter electrode, a reversible hydrogen electrode as the reference electrode, and carbon paper drop-coated with V<sub>O</sub>-Mo<sub>X</sub>Co<sub>3-X</sub>O<sub>4</sub> or Co<sub>3</sub>O<sub>4</sub> with a catalyst loading of 5 mg cm<sup>-2</sup> as a working electrode. Electrochemical tests were performed on commercial Ir/C catalysts and blank carbon paper as comparisons. Polarization curves were tested at 25 °C in 0.1 M HClO<sub>4</sub> solution with a scan rate of 5 mV s<sup>-1</sup>. All polarization curves were *iR*-corrected.

Electrochemical *in situ* FT-IR measurements were carried out on a Nicolet IS50 FT-IR spectrometer, assisted by a PIKE VeeMAX III variable angle sampling accessory (Shanghai Linglu Instrument Co. Ltd) and a liquid nitrogen cooled MCT detector. In the Spectro electrochemical three-electrode cell, a glassy carbon electrode was used as the working electrode, and a platinum wire and silver/silver chloride electrode were used as the counter electrode and reference electrode, respectively. The glassy carbon electrode pressed a drop of carbon paper coated with catalyst material (catalyst loading of 5 mg cm<sup>-2</sup>) onto the IR window to form a thin layer (1-10 μm) of electrolyte. Then, the IR beam passed through the optical window through the thin layer of electrolyte, and reflected IR light on the surface of the electrode. Finally, the IR

detector was reached to collect the signal. 0.1 M HClO<sub>4</sub> was used as the electrolyte for the OER test. The test procedure was performed on an iviumstat electrochemical workstation by raising the electrode potential from OCP to 1.9 V vs. RHE and then recording the IR spectra.

Electrochemical *in situ* Raman measurements were performed on a Renishaw Via Qontor laser micro confocal Raman spectrometer. An electrochemical *in situ* Raman H-type spectral cell (Beijing Scistar Technology Co. Ltd.) was used for *in situ* Raman spectroscopy during electrochemical OER catalysis. Electrochemical testing of OER was performed on a typical three-electrode system at a typical three-electrode on an iviumstat electrochemical workstation. Catalyst-loaded carbon paper (area 1 cm<sup>2</sup>) was used as the working electrode. Silver/silver chloride and graphite rod electrodes were used as reference and counter electrodes, respectively. The catalyst was electrochemically activated before the *in situ* electrochemical Raman experiments. Activation was performed in a potential window of (1.3 to 1.9V vs. RHE) with a scan rate of 50 mV s<sup>-1</sup> until the CV curve stabilized. Time-varying experimental Raman spectra were performed at different potentials and Raman spectra were collected.

### **Characterizations.**

X-ray diffraction (XRD) measurements were taken on a Rigaku SmartLab 9 kW x-ray diffractometer. Scanning electron microscopy (SEM) characterizations were carried out on a ThermoFisher Apero C scanning electron microscope. Transmission electron microscopy (TEM) measurements were performed on an FEI Talos F200S 200kV scanning/transmission electron microscope. X-ray photoelectron spectroscopy (XPS) characterizations were carried out on a Thermo Fisher Escalab 250Xi x-ray photoelectron spectrometer. Raman spectroscopy was performed on a Renishaw plc Raman spectrometer. Electron paramagnetic resonance (EPR) measurements were performed on a Bruker A300 electron paramagnetic resonance popper. Fourier transform infrared spectroscopy (FT-IR) characterizations were carried out on a Nicolet IS50 FT-IR spectrometer.

X-ray absorption fine structures characterizations were performed on at Co K-edge of various composites at room temperature in the transmission mode with silicon drift

fluorescence detector at beamline TLS07A1 of National Synchrotron Radiation Research Center (NSRRC) operated with a Si (111) double crystal monochromator. The synchrotron was detected at 1.5 GeV and 250 mA. Data reduction, data analysis, and EXAFS fitting were performed and analyzed with the Athena and Artemis programs of the Demeter data analysis packages that utilize the FEFF6 program to fit the EXAFS data.<sup>S1, S2</sup> The energy calibration of the sample was conducted through standard and Co foil, which as a reference was simultaneously measured. A linear function was subtracted from the pre-edge region, then the edge jump was normalized using Athena software. The  $\chi(k)$  data were isolated by subtracting a smooth, third-order polynomial approximating the absorption background of an isolated atom. The  $k^3$ -weighted  $\chi(k)$  data were Fourier transformed after applying a Hanning window function ( $\Delta k = 1.0$ ). For EXAFS modeling, the global amplitude EXAFS ( $CN$ ,  $R$ ,  $\sigma^2$  and  $\Delta E_0$ ) was obtained by nonlinear fitting, with least-squares refinement, of the EXAFS equation to the Fourier-transformed data in  $R$ -space, using Artemis software, EXAFS of the Co foil are fitted and the obtained amplitude reduction factor  $S_0^2$  value (1.00) was set in the EXAFS analysis to determine the coordination numbers ( $CNs$ ) in the Co-O and Co-Co scattering path in sample.

### **DFT Calculation**

All spined calculations are performed in the framework of the density functional theory with the projector augmented plane-wave method, as implemented in the Vienna ab initio simulation package.<sup>S3</sup> The generalized gradient approximation proposed by Perdew, Burke, and Ernzerhof is selected for the exchange-correlation potential.<sup>S4</sup> The long range van der Waals interaction is described by the DFT-D3 approach<sup>S5</sup> The cut-off energy for plane wave is set to 450 eV. The energy criterion is set to 10<sup>-5</sup> eV in iterative solution of the Kohn-Sham equation. The structural models were built according to the experimental data. A slab p(11 Å × 11 Å × 25 Å) was used, and Brillouin zone integration was accomplished by Monkhorst-Pack k-point (2×2×1) mesh to simulate the two kinds of materials (Co<sub>3</sub>O<sub>4</sub>, V<sub>O</sub>-Mo<sub>X</sub>Co<sub>3-X</sub>O<sub>4</sub>). A vacuum layer of >15 Å is added perpendicular to the sheet to avoid artificial interaction between periodic images. All the structures are relaxed until the residual forces on the atoms have

declined to less than 0.03 eV/Å. The Gibbs free energy change was obtained based on the widely accept OER four-electron transfer mechanism according to the previous report.<sup>S6, S7</sup>

### Additional Figures

The XRD patterns of the intermediates for synthesizing  $V_O\text{-Mo}_x\text{Co}_{3-x}\text{O}_4$  and  $\text{Co}_3\text{O}_4$  after hydrothermal treatment are shown in Figure S1. As a result, the phase of cobalt hydroxide ( $\text{Co(OH)}_2$ ) is generated as a intermediate after hydrothermal treatment for further fabricating  $\text{Co}_3\text{O}_4$ . It can be found that the diffraction peaks of the intermediate for preparing  $V_O\text{-Mo}_x\text{Co}_{3-x}\text{O}_4$  slightly left-shift to the lower angles when compared with that for  $\text{Co}_3\text{O}_4$ . It indicates that Mo, with a larger radius, is doped into the lattice of  $\text{Co(OH)}_2$ .

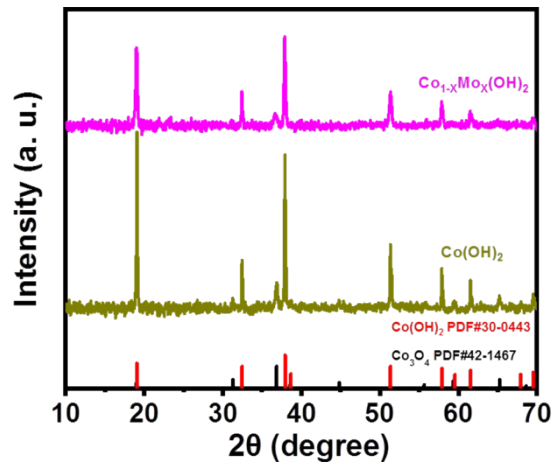

**Figure S1.** XRD patterns of the intermediates for synthesizing  $V_O\text{-Mo}_x\text{Co}_{3-x}\text{O}_4$  and  $\text{Co}_3\text{O}_4$  after hydrothermal treatment.

In Figure S2, it can be noticed that the peak position of  $A_{1g}$  in  $V_O\text{-Mo}_x\text{Co}_{3-x}\text{O}_4$  shifts to a lower frequency compared to that of  $\text{Co}_3\text{O}_4$ .

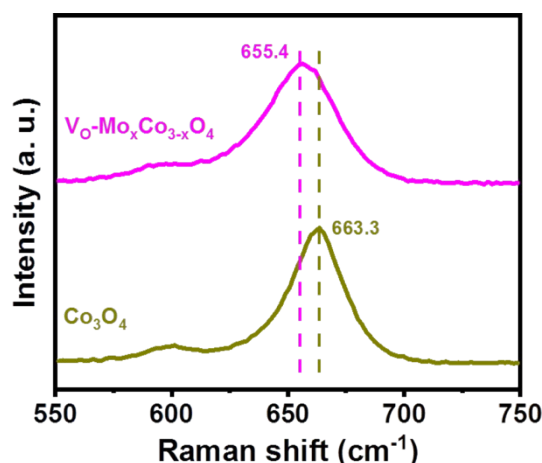

**Figure S2.** The Local Raman spectroscopy of  $V_0\text{-Mo}_x\text{Co}_{3-x}\text{O}_4$  and  $\text{Co}_3\text{O}_4$ .

The FT-IR spectra of  $V_0\text{-Mo}_x\text{Co}_{3-x}\text{O}_4$  and  $\text{Co}_3\text{O}_4$  are shown in Figure S3. Distinctive broad bands around  $3426\text{ cm}^{-1}$  were found on the FT-IR spectra, which mainly originate from the O-H scaling vibration of hydrogen-bonded water molecules.<sup>S8</sup> The  $\delta\text{H}_2\text{O}$  vibration was also observed at  $1632\text{ cm}^{-1}$ .<sup>S9</sup> The FT-IR bands observed at 663 and  $576\text{ cm}^{-1}$  are characteristic of the Co-O stretching vibration.<sup>S10</sup> The band at  $663\text{ cm}^{-1}$  is attributed to the stretching vibration of the tetrahedral  $\text{Co}^{2+}\text{-O}$  bond, and the band at  $576\text{ cm}^{-1}$  corresponds to the stretching peak of the octahedral  $\text{Co}^{3+}\text{-O}$  bond. In particular, the stretching peak of the  $\text{Co}^{3+}\text{-O}$  bond at  $566\text{ cm}^{-1}$  for  $V_0\text{-Mo}_x\text{Co}_{3-x}\text{O}_4$  is found to significantly shift to a lower frequency, indicating that Mo heteroatoms are doped into the octahedral sites.

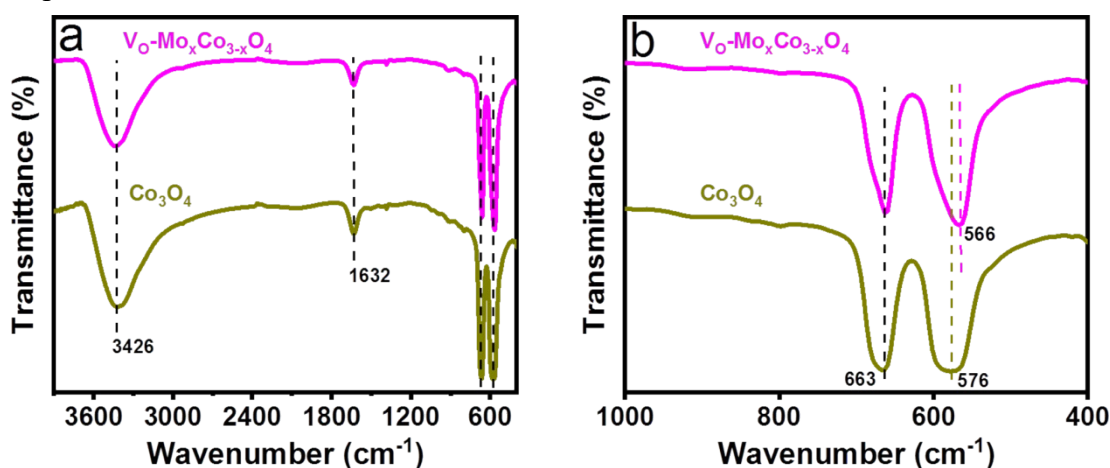

**Figure S3.** FT-IR spectra of  $V_0\text{-Mo}_x\text{Co}_{3-x}\text{O}_4$  and  $\text{Co}_3\text{O}_4$ .

SEM and TEM images of  $\text{Co}_3\text{O}_4$  are shown in Figure S4. As shown in Figure S4, SEM image of  $\text{Co}_3\text{O}_4$  exhibits  $\text{Co}_3\text{O}_4$  nanoparticles with sizes from 50-500 nm. Figure S4b

presents the HR-TEM image of  $\text{Co}_3\text{O}_4$  edges. The crystal indices of 0.28 and 0.24 nm correspond to the (220) and (311) faces of  $\text{Co}_3\text{O}_4$ , respectively (Figure S4c). Based on the HAADF-STEM and corresponding elemental mapping images, a homogeneous distribution of cobalt and O in  $\text{Co}_3\text{O}_4$  can be observed (Figure S4d-f).

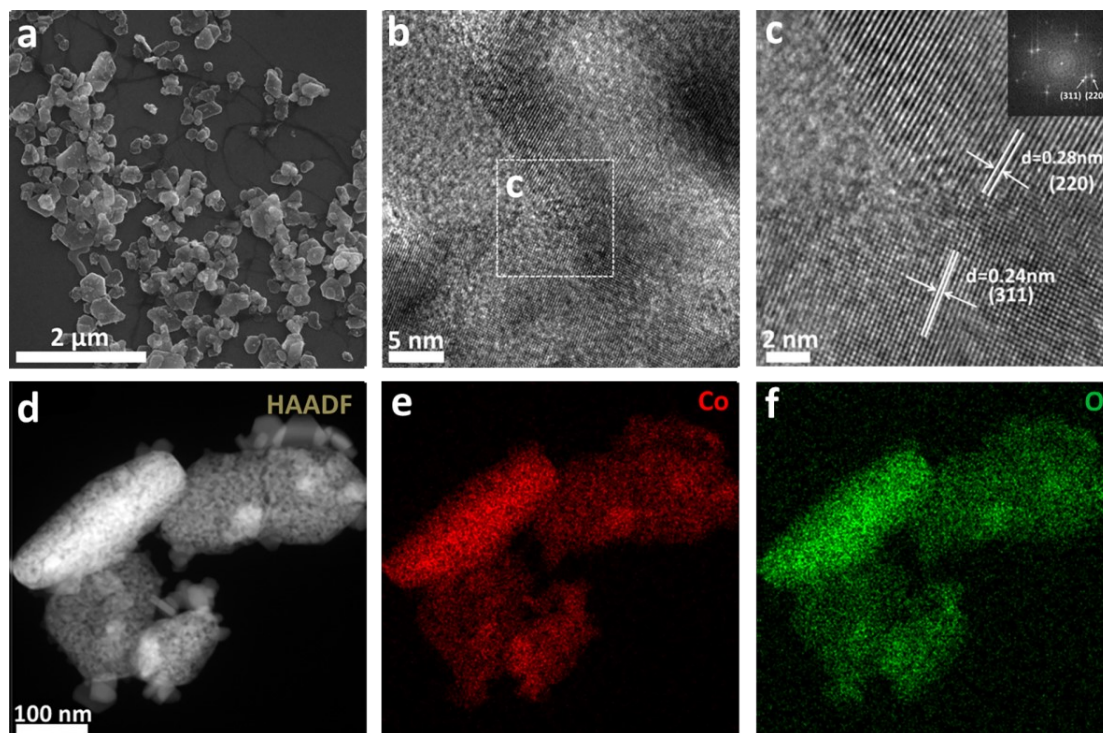

**Figure S4.** (a) SEM image of  $\text{Co}_3\text{O}_4$  (b, c) HR-TEM images of  $\text{Co}_3\text{O}_4$ . (d-f) HAADF-STEM and corresponding elemental mapping images of  $\text{Co}_3\text{O}_4$ .

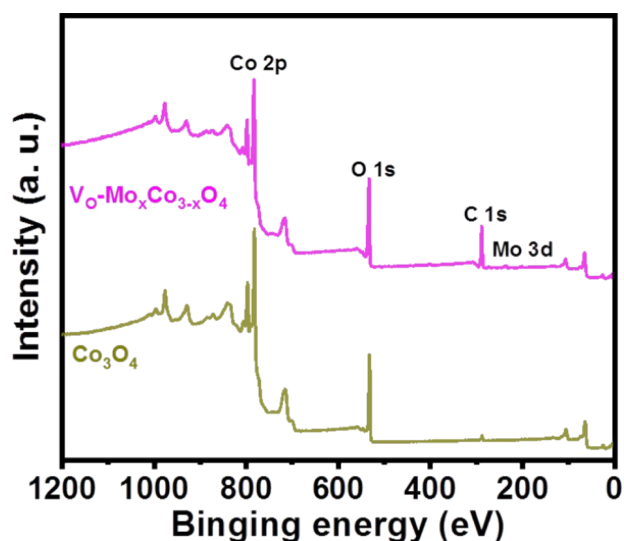

**Figure S5.** XPS survey spectra of  $\text{V}_0\text{-Mo}_x\text{Co}_{3-x}\text{O}_4$  and  $\text{Co}_3\text{O}_4$ .

The XPS spectra of  $\text{V}_0\text{-Mo}_x\text{Co}_{3-x}\text{O}_4$  and  $\text{Co}_3\text{O}_4$  in Co 2p are shown in Figure S6, where

the BEs of 780.7 and 796.2 eV can be attributed to  $\text{Co}^{2+}$ ,<sup>S11</sup> and the BEs of 782.4 and 798.4 eV are attributed to the binding energy associated with the  $\text{Co}^{3+}$ .<sup>S12</sup>

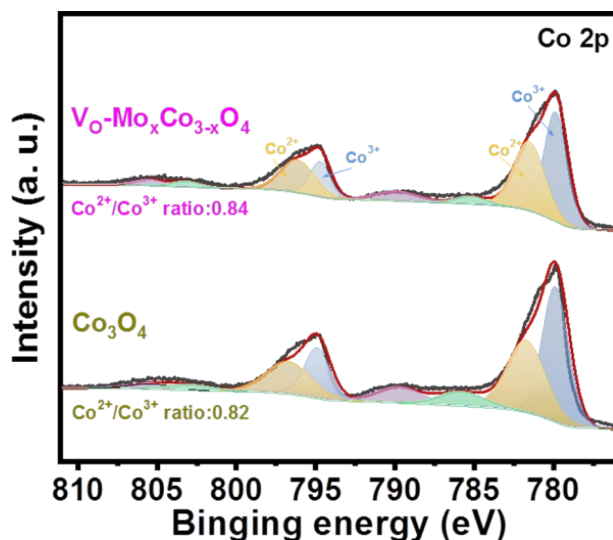

**Figure S6.** XPS spectra of  $\text{V}_\text{O}\text{-Mo}_x\text{Co}_{3-x}\text{O}_4$  and  $\text{Co}_3\text{O}_4$  in Co 2p.

As shown in Figure S7, the XPS spectrum of  $\text{V}_\text{O}\text{-Mo}_x\text{Co}_{3-x}\text{O}_4$  in Mo 3d can be decomposed into two sets of peaks, which are attributed to  $\text{Mo}^{4+}$  (231.6 and 234.7 eV) and  $\text{Mo}^{6+}$  (232.8 and 235.9 eV).<sup>S13</sup>

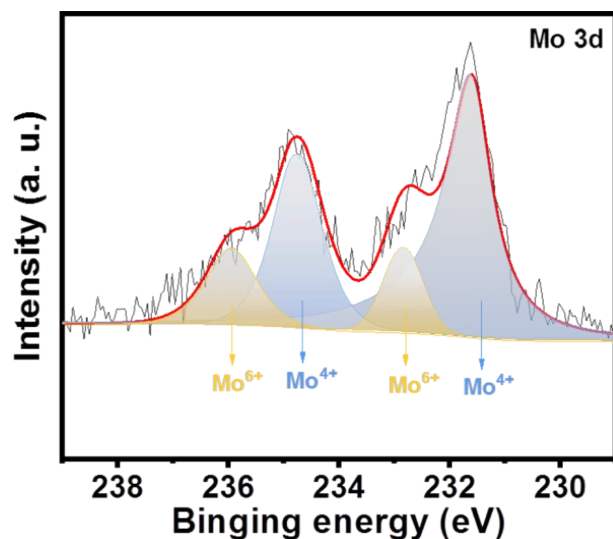

**Figure S7.** XPS spectra of  $\text{V}_\text{O}\text{-Mo}_x\text{Co}_{3-x}\text{O}_4$  in Mo 3d.

The XPS spectra of  $\text{V}_\text{O}\text{-Mo}_x\text{Co}_{3-x}\text{O}_4$  and  $\text{Co}_3\text{O}_4$  in O 1s are shown in Figure S8, where BEs of 530.4, 531.7, and 533.1 eV can be assigned to lattice oxygen (O1), oxygen vacancies (O2), and surface adsorbed water species (O3).<sup>S14</sup> The spectrum of  $\text{V}_\text{O}\text{-Mo}_x\text{Co}_{3-x}\text{O}_4$  in O 1s exhibits a higher concentration of oxygen vacancies (O2) when compared with that of  $\text{Co}_3\text{O}_4$ .



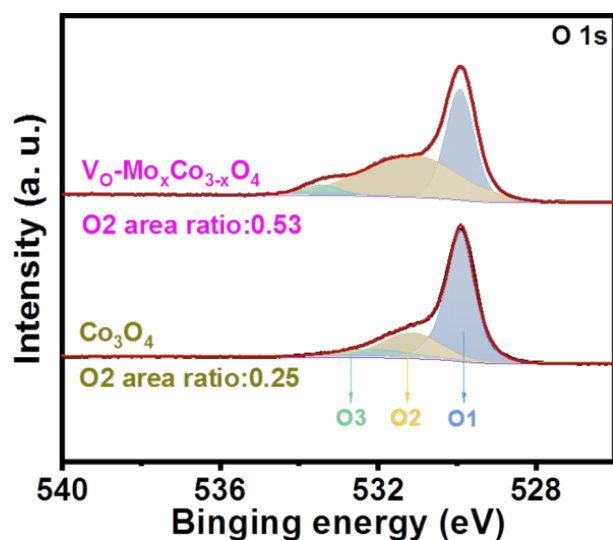

**Figure S8.** XPS spectra of  $V_{O}-Mo_{x}Co_{3-x}O_{4}$  and  $Co_{3}O_{4}$  in O 1s.

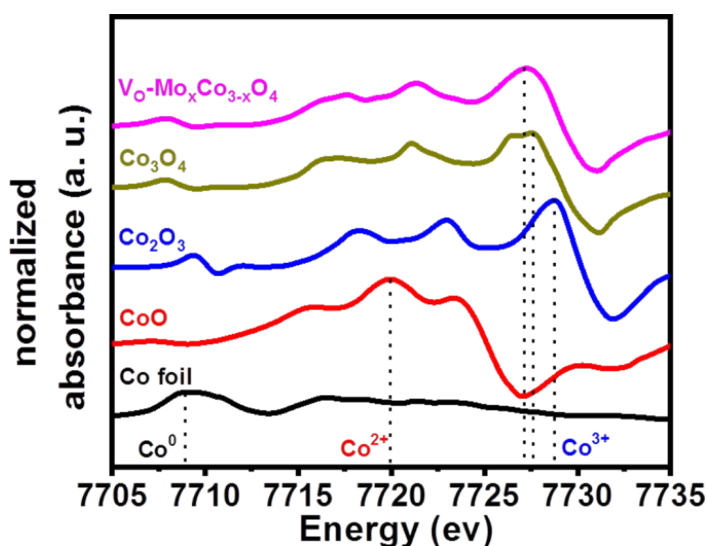

**Figure S9.** The first derivative of XANES spectra at Co K-edge of  $V_{O}-Mo_{x}Co_{3-x}O_{4}$  and  $Co_{3}O_{4}$  and reference materials.

The annealed temperature for preparing the  $V_{O}-Mo_{x}Co_{3-x}O_{4}$  was optimized. The samples after hydrothermal treatment were washed and cleaned and then annealed under an air atmosphere at 200, 300, and 400 °C for 2 h, respectively. As displayed in Figure S10, the sample annealed at 300 °C exhibits the best activity towards OER in an acidic medium.

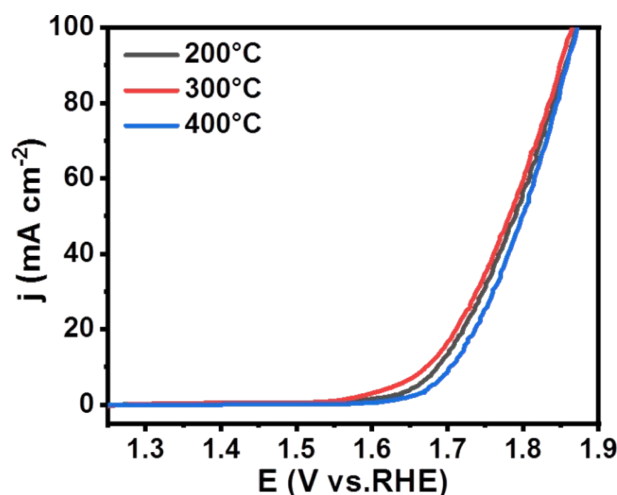

**Figure S10.** Polarization curves for different annealing temperatures.

It is well known that specific surface areas (ECSA) of electrocatalysts play an important role in the electrochemical reaction process. Thus, ECSA is considered an important parameter for evaluating performances of electrocatalysts and clarifying the origin of catalytic activity. Generally, ECSA is estimated through electrochemical double layer capacitance ( $C_{dl}$ ) of electrocatalysts from CV curves in a non-Faradaic region with different scan rates:<sup>S15</sup>

$$C_{dl} = \frac{d(\Delta j)}{2dv}$$

In this formula,  $\Delta j$  represents the capacitive current density in selected potential on CV curves and  $v$  is corresponding to the scan rate. In a word, the slope of  $\Delta j$  against different scan rates can be used as a parameter for evaluating its ECSA.<sup>S16</sup> Relationships between  $\Delta j$  against different scan rates are obtained from corresponding CV curves on various electrocatalysts in 0.1 M HClO<sub>4</sub> Figure S11. As shown in Figure S11d, V<sub>O</sub>-Mo<sub>X</sub>Co<sub>3-X</sub>O<sub>4</sub> shows a larger  $C_{dl}$  of 1.14 mF cm<sup>-2</sup>. The loadings of V<sub>O</sub>-Mo<sub>X</sub>Co<sub>3-X</sub>O<sub>4</sub> and Co<sub>3</sub>O<sub>4</sub> on the electrodes for acidic OER are 1.0 mg cm<sup>-2</sup>. For comparison, the loading of Ir on the electrode is 0.5 mg cm<sup>-2</sup>. The ECSAs of V<sub>O</sub>-Mo<sub>X</sub>Co<sub>3-X</sub>O<sub>4</sub>, Co<sub>3</sub>O<sub>4</sub>, and Ir on the electrodes for acidic OER can be obtained according to the equation:

$$ECSA = \frac{C_{dl}}{C_s}$$

Where  $C_s$  is the specific capacitance of the electrode and we adopted the general

specific capacitance of  $C_s = 0.040 \text{ mF cm}^{-2}$  based typical reported value.<sup>S17</sup>  $C_{dl}$  is the electrochemical double-layer capacitance of electrocatalysts, which can be estimated from CV curves in a non-Faradaic region with different scan rates.<sup>S18</sup>

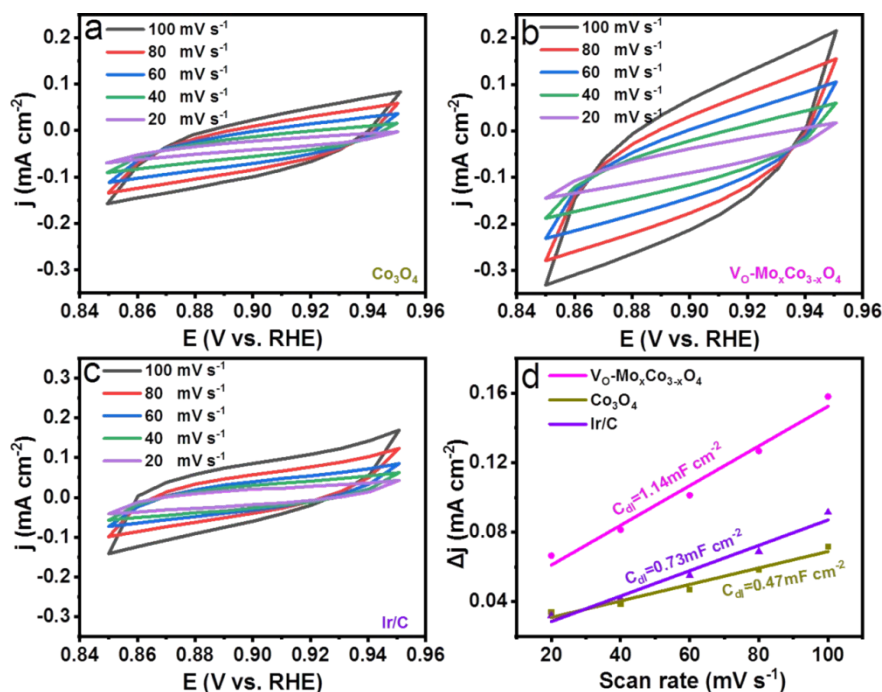

**Figure S11.** CV curves of (a)  $\text{Co}_3\text{O}_4$ , (b)  $\text{V}_x\text{-Mo}_x\text{Co}_{3-x}\text{O}_4$ , and (c) Ir/C

electrocatalysts in 0.1 M  $\text{HClO}_4$  from 0.85 to 0.95 V vs. RHE with scan rates from 20 to 100  $\text{mV s}^{-1}$  (d) Relationships between capacitive current densities ( $\Delta j$ ) measured on various electrocatalysts against different scan rates in 0.1 M  $\text{HClO}_4$ .

The ECSA-normalized current densities of acidic OER on these electrocatalysts are obtained to measure the intrinsic activities, as shown in Figure S12a. As a result, at the overpotential of 470 mV,  $\text{V}_x\text{-Mo}_x\text{Co}_{3-x}\text{O}_4$ ,  $\text{Co}_3\text{O}_4$ , and Ir/C exhibit ECSA-normalized current densities of 1.64, 0.64, and 0.28  $\text{mA cm}^{-2}$ , respectively (Figure S12b). Therefore,  $\text{V}_x\text{-Mo}_x\text{Co}_{3-x}\text{O}_4$  displays better intrinsic activity towards acidic OER compared with Ir/C.

Generally, octahedral cations are extensively regarded as the real active sites of spinel oxides for OER, because they are preferentially exposed on the near-surface.<sup>S19, S20</sup> Therefore, the tetrahedral cations are believed to have almost no contribution to the OER activity, owing to that they are relatively unlikely to be exposed on the surface.<sup>S20, S21</sup> To clarify the origination of the enhancement for acidic OER on the as-prepared  $\text{V}_x\text{-Mo}_x\text{Co}_{3-x}\text{O}_4$

$\text{Mo}_x\text{Co}_{3-x}\text{O}_4$ , the turnover frequency (TOFs) was calculated (Figure S12c). The TOF is a parameter of the instantaneous efficiency of a catalyst, which is calculated as the derivative of the number of turnovers of the catalytic cycle concerning the time per active site<sup>S18</sup>:

$$TOF = \frac{jA}{4Fm}$$

Where  $j$  ( $\text{mA cm}^{-2}$ ) is the current density measured at the applied potential,  $A$  is the geometric area of an electrode,  $F$  is the Faraday constant ( $96,485 \text{ C mol}^{-1}$ ), and  $m$  is the mole number of the electrocatalyst on the electrode.<sup>S18</sup> The parameter of 4 refers to that four electrons are transferred for the generation of one  $\text{O}_2$  molecule. As a result, at the overpotential of 470 mV,  $\text{V}_0\text{-Mo}_x\text{Co}_{3-x}\text{O}_4$ ,  $\text{Co}_3\text{O}_4$ , and Ir/C present TOF values of 0.35, 0.14, and  $0.19 \text{ O}_2 \text{ s}^{-1}$ , respectively (Figure S12d).  $\text{V}_0\text{-Mo}_x\text{Co}_{3-x}\text{O}_4$  possesses a larger TOF value than that of  $\text{Co}_3\text{O}_4$ , indicating higher intrinsic activity of each active site. Thus, despite less active sites (octahedral cations),  $\text{V}_0\text{-Mo}_x\text{Co}_{3-x}\text{O}_4$  achieves better activity towards acidic OER than  $\text{Co}_3\text{O}_4$ .

Additionally, the mass activities of acidic OER on  $\text{V}_0\text{-Mo}_x\text{Co}_{3-x}\text{O}_4$ ,  $\text{Co}_3\text{O}_4$ , and Ir/C electrocatalysts have been studied as well (Figure S12e). As a result,  $\text{V}_0\text{-Mo}_x\text{Co}_{3-x}\text{O}_4$  and  $\text{Co}_3\text{O}_4$  exhibit mass activities of 62.56 and  $10.61 \text{ mA mg}^{-1} \text{ Co}_3\text{O}_4$  at the overpotential of 470 mV (Figure S12f). Ir/C displays a mass activity of  $12.78 \text{ mA mg}^{-1} \text{ Ir}$  at the overpotential of 470 mV. Thus,  $\text{V}_0\text{-Mo}_x\text{Co}_{3-x}\text{O}_4$  possesses a higher intrinsic activity towards acidic OER compared with Ir/C.

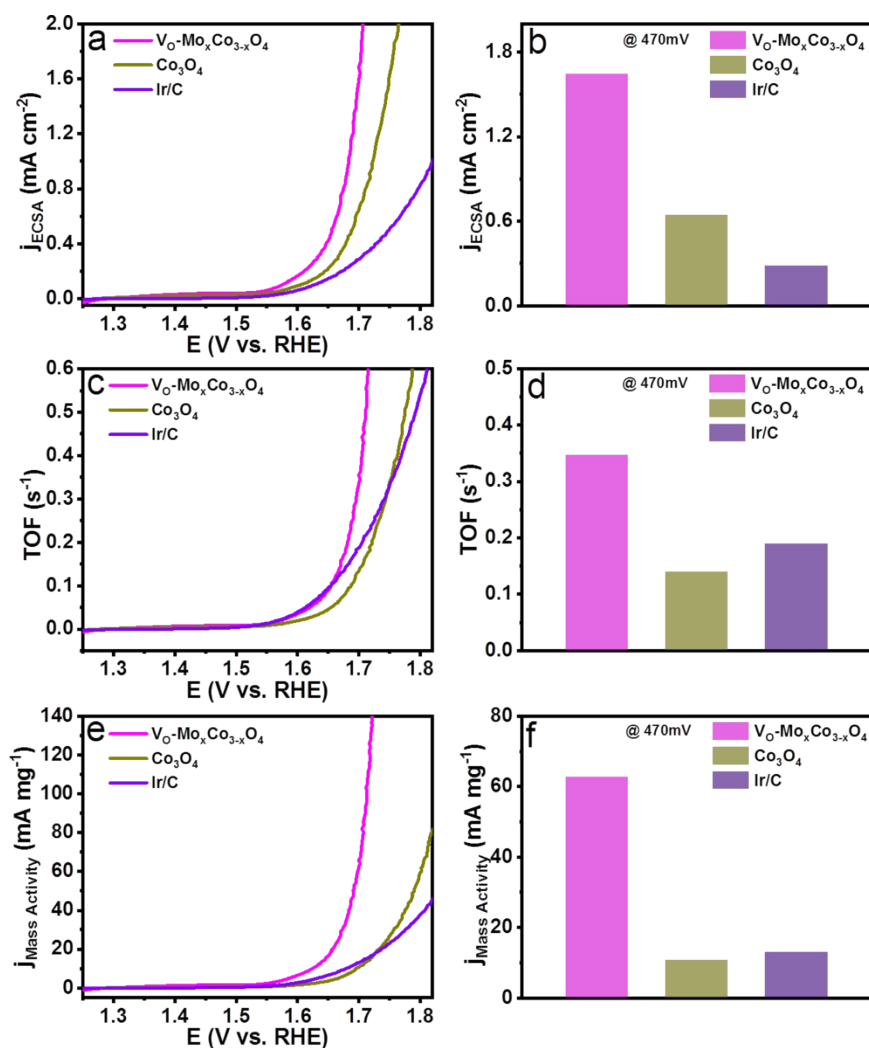

**Figure S12.** (a) ECSA-normalized polarization curves of OER on  $V_0\text{-Mo}_x\text{Co}_{3-x}\text{O}_4$ ,  $\text{Co}_3\text{O}_4$ , and Ir/C electrocatalysts. (b) Corresponding ECSA-normalized specific current density of  $V_0\text{-Mo}_x\text{Co}_{3-x}\text{O}_4$ ,  $\text{Co}_3\text{O}_4$ , and Ir/C for acidic OER at the overpotential of 470 mV. (c) TOF curves of OER on  $V_0\text{-Mo}_x\text{Co}_{3-x}\text{O}_4$ ,  $\text{Co}_3\text{O}_4$ , and Ir/C electrocatalysts. (d) Corresponding TOF values of  $V_0\text{-Mo}_x\text{Co}_{3-x}\text{O}_4$ ,  $\text{Co}_3\text{O}_4$ , and Ir/C for acidic OER at the overpotential of 470 mV. (e) The mass-normalized OER polarization curves of curves of OER on  $V_0\text{-Mo}_x\text{Co}_{3-x}\text{O}_4$ ,  $\text{Co}_3\text{O}_4$ , and Ir/C electrocatalysts. (f) Corresponding mass activity values of  $V_0\text{-Mo}_x\text{Co}_{3-x}\text{O}_4$ ,  $\text{Co}_3\text{O}_4$ , and Ir/C for acidic OER at the overpotential of 470 mV.

As shown in Figure S13, the Nyquist plot of  $V_0\text{-Mo}_x\text{Co}_{3-x}\text{O}_4$  exhibits a smaller radius than that of  $\text{Co}_3\text{O}_4$ . Although constructing defects will increase the electronic resistance of a material, the radius is determined by the charge transfer resistance (reaction resistance), rather than intrinsic resistance.<sup>S22, S23</sup> Furthermore, the Nyquist plots of  $V_0\text{-}$

$\text{Mo}_x\text{Co}_{3-x}\text{O}_4$  and  $\text{Co}_3\text{O}_4$  are fitted by the two-time constant model, as shown in Table S4.<sup>S20</sup> As a result,  $\text{V}_\text{O}\text{-Mo}_x\text{Co}_{3-x}\text{O}_4$  (1.31  $\Omega$ ) and  $\text{Co}_3\text{O}_4$  (1.34  $\Omega$ ) exhibit similar values of solution resistance ( $R_s$ ) because the same three-electrode-system was used for the electrochemical measurements.  $\text{V}_\text{O}\text{-Mo}_x\text{Co}_{3-x}\text{O}_4$  (1.26  $\Omega$ ) shows a smaller charge transfer resistance ( $R_{ct}$ ) than  $\text{Co}_3\text{O}_4$  (2.40  $\Omega$ ), owing to the faster kinetics of the OER process through the OPM pathway.

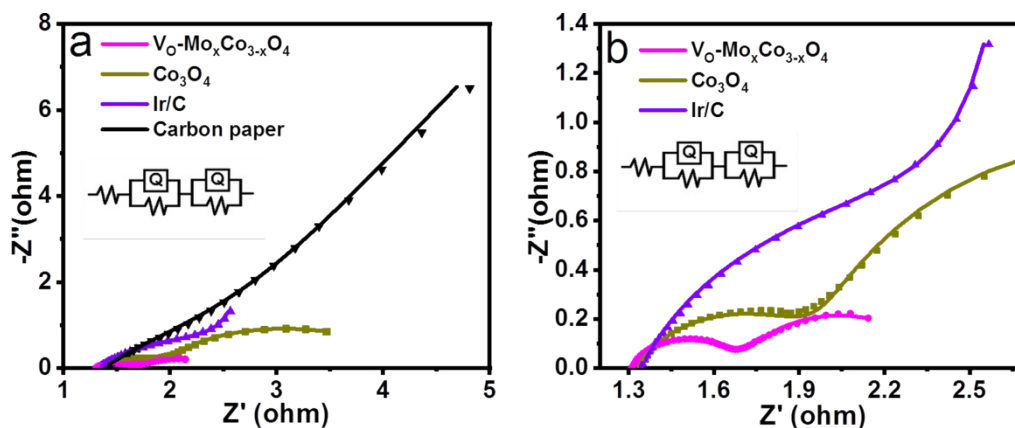

**Figure S13.** Nyquist plots of  $\text{Co}_3\text{O}_4$ ,  $\text{V}_\text{O}\text{-Mo}_x\text{Co}_{3-x}\text{O}_4$ , Ir/C and carbon paper.

The XRD, SEM, XPS, and TEM characterizations have been performed to investigate the structural stability of  $\text{V}_\text{O}\text{-Mo}_x\text{Co}_{3-x}\text{O}_4$  after the stability test (Figure S14-17). The XRD pattern, XPS spectrum, and morphology of  $\text{V}_\text{O}\text{-Mo}_x\text{Co}_{3-x}\text{O}_4$  after stability test remains unchanged, indicating a high structural stability.

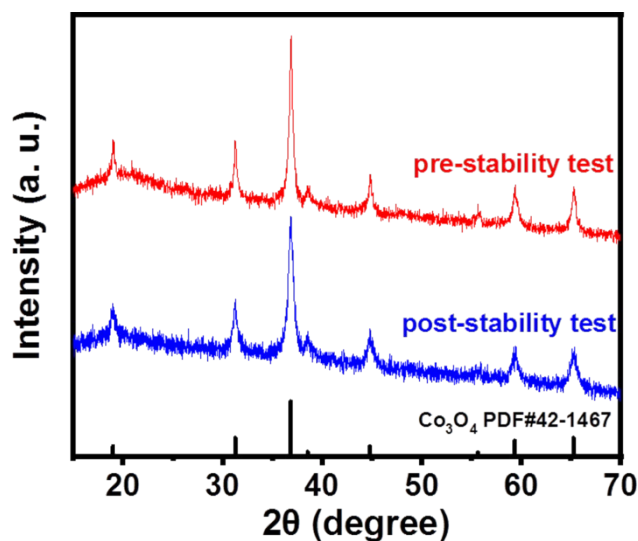

**Figure S14.** XRD patterns of  $\text{V}_\text{O}\text{-Mo}_x\text{Co}_{3-x}\text{O}_4$  before and after the stability test.

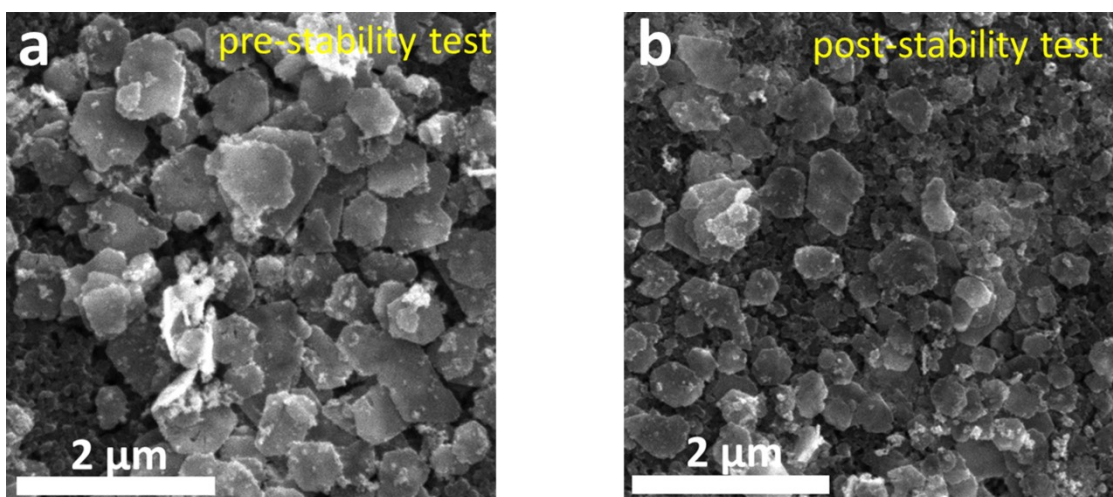

Figure S15. The SEM images of  $V_{O}-Mo_{x}Co_{3-x}O_{4}$  before and after stability test.

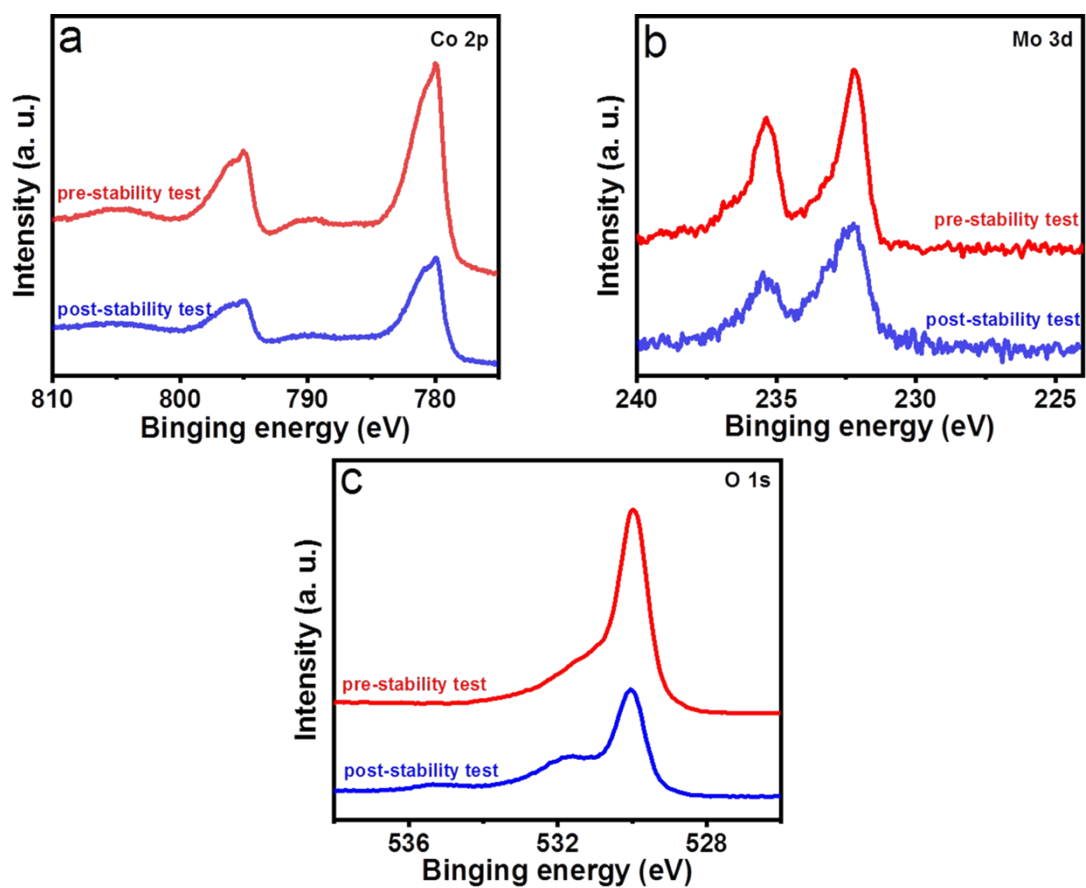

Figure S16. XPS spectras of  $V_{O}-Mo_{x}Co_{3-x}O_{4}$  before and after stability test.

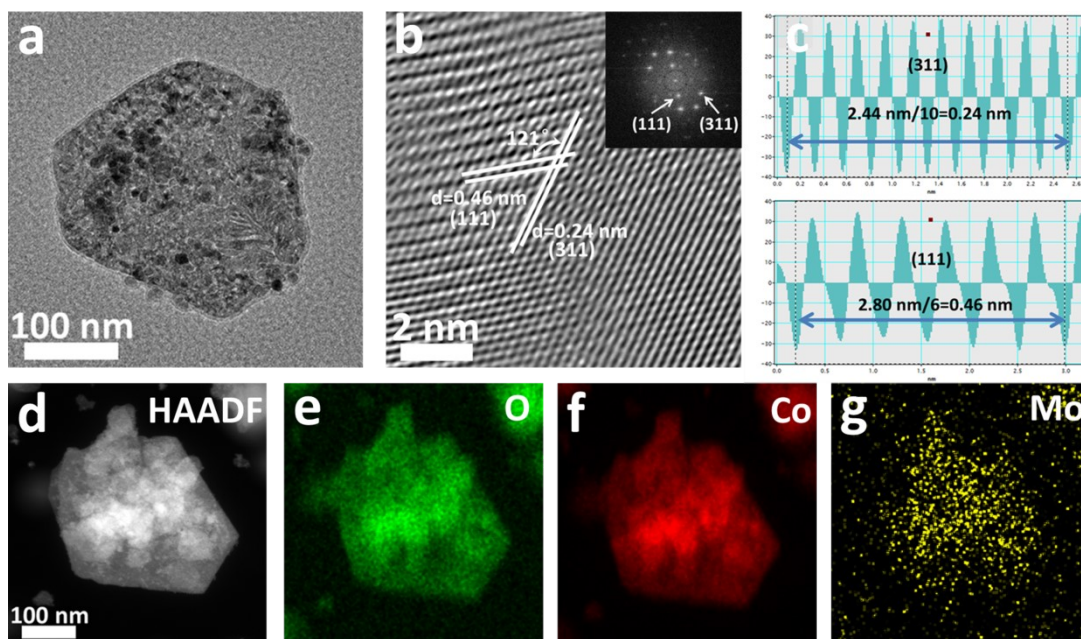

**Figure S17.** (a, b) The TEM images of  $V_O\text{-Mo}_X\text{Co}_{3-X}\text{O}_4$  after the stability test. (c) Intensity profiles of the  $d$ -spacing for the (311) and (111) facets of  $V_O\text{-Mo}_X\text{Co}_{3-X}\text{O}_4$  after the stability test. (d-g) HAADF-STEM and corresponding elemental mapping images of  $V_O\text{-Mo}_X\text{Co}_{3-X}\text{O}_4$  after the stability test.

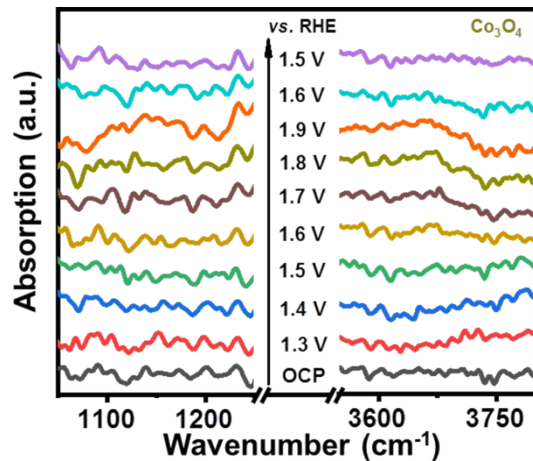

**Figure S18.** *In situ* FT-IR spectra recorded at various applied potentials (vs. RHE) in 0.1 M  $\text{HClO}_4$  electrolyte on  $\text{Co}_3\text{O}_4$ .



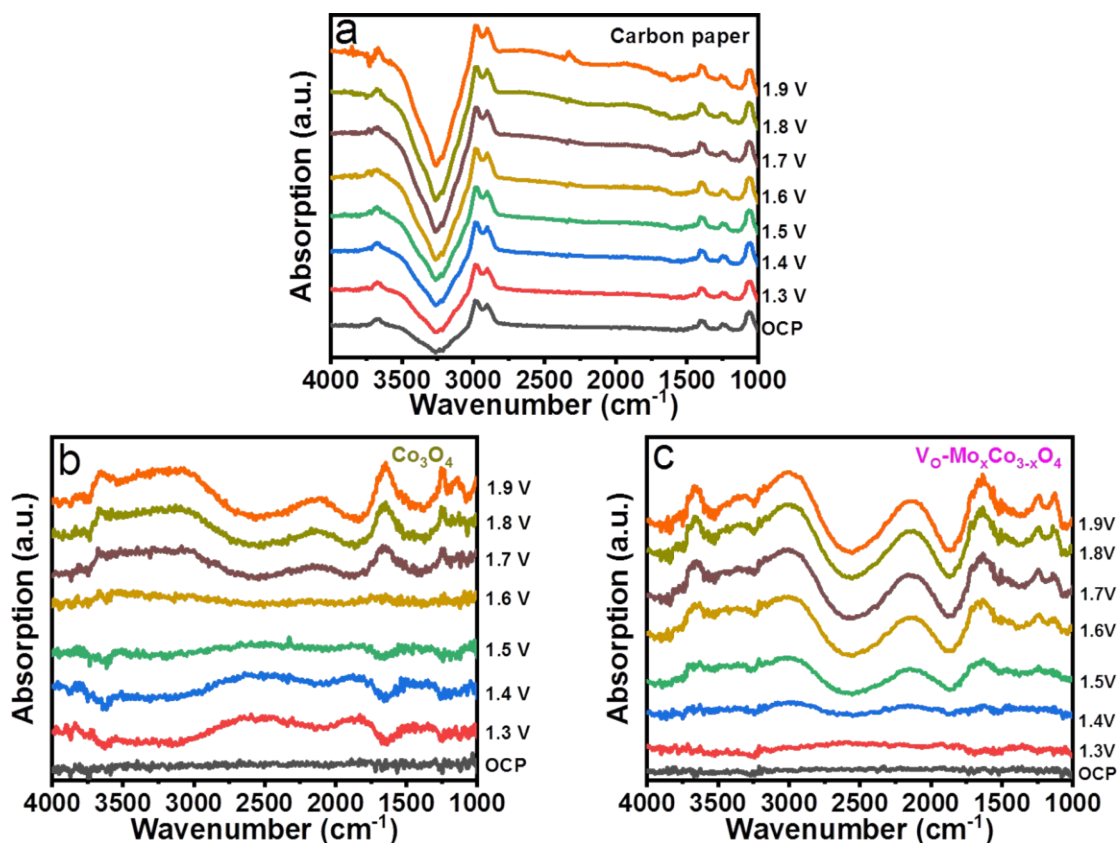

**Figure S19.** *In situ* FT-IR spectra of carbon paper,  $\text{Co}_3\text{O}_4$  and  $\text{V}_0\text{-Mo}_x\text{Co}_{3-x}\text{O}_4$  at various constant potentials (vs. RHE).

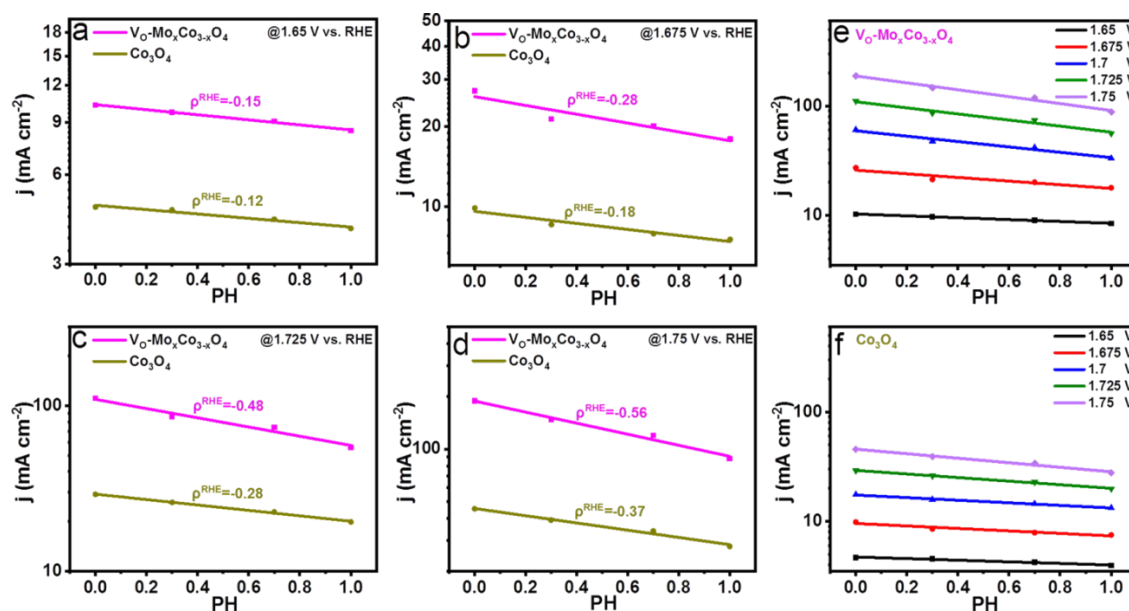

**Figure S20.** (a-d) OER specific activities of  $\text{Co}_3\text{O}_4$  and  $\text{V}_0\text{-Mo}_x\text{Co}_{3-x}\text{O}_4$  at 1.650, 1.675, 1.725, and 1.750 V against the different pH values. OER specific activities of (e)  $\text{V}_0\text{-Mo}_x\text{Co}_{3-x}\text{O}_4$  and (f)  $\text{Co}_3\text{O}_4$  obtained at different potentials against pH values.

As shown in Figure S21a, distinctive adsorption bands at about 503  $\text{cm}^{-1}$  can be detected

on the *in situ* Raman spectra of  $\text{Co}_3\text{O}_4$  measured above 1.6 V (vs. RHE), which is related to the generation of  $\ast\text{OOH}$ , the key intermediate of the AEM pathway.<sup>S24, S25</sup> However, similar bands can not be detected on the *in situ* Raman spectra of  $\text{V}_0\text{-Mo}_x\text{Co}_{3-x}\text{O}_4$ . It means that the generated species of  $\ast\text{O-O}\ast$  and  $\ast\text{O-O}$  detected on the *in situ* FTIR spectra of  $\text{V}_0\text{-Mo}_x\text{Co}_{3-x}\text{O}_4$  are not from the  $\ast\text{OOH}$  species (Figure S21b). Generally, it has been extensively demonstrated that the distinctive intermediates of  $\ast\text{O-O}\ast$  and  $\ast\text{O-O}$  during the OPM pathway are from direct oxygen radical self-coupling to be oxygen bridge. Thus, the detection of  $\ast\text{O-O}\ast$  and  $\ast\text{O-O}$  species is usually regarded as direct evidence for triggering the OPM pathway during the OER process.

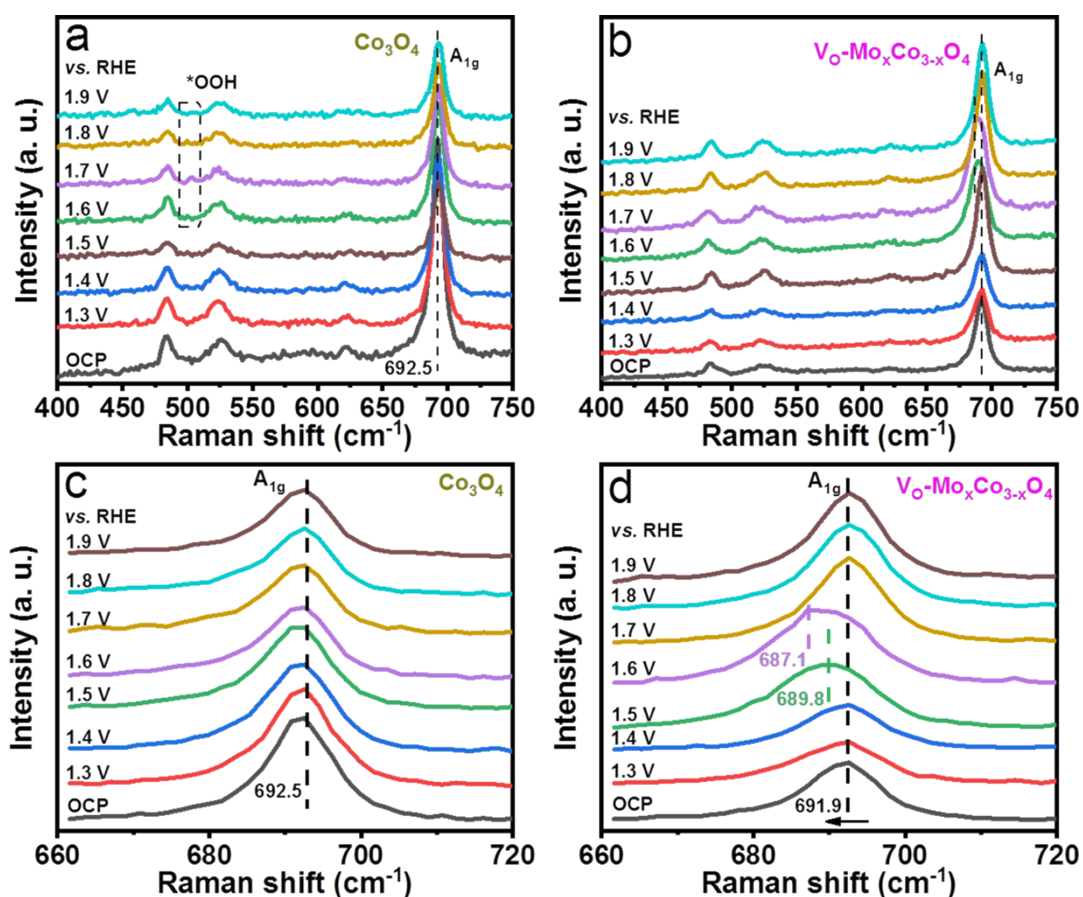

**Figure S21.** *In situ* Raman spectra of (a)  $\text{Co}_3\text{O}_4$  and (b)  $\text{V}_0\text{-Mo}_x\text{Co}_{3-x}\text{O}_4$  at various applied potentials (vs. RHE). The  $A_{1g}$  mode on the *in situ* Raman spectra of (c)  $\text{Co}_3\text{O}_4$  and (d)  $\text{V}_0\text{-Mo}_x\text{Co}_{3-x}\text{O}_4$  obtained during stepping the potential from OCP to 1.9 V vs. RHE in 0.1 M  $\text{HClO}_4$  electrolyte.

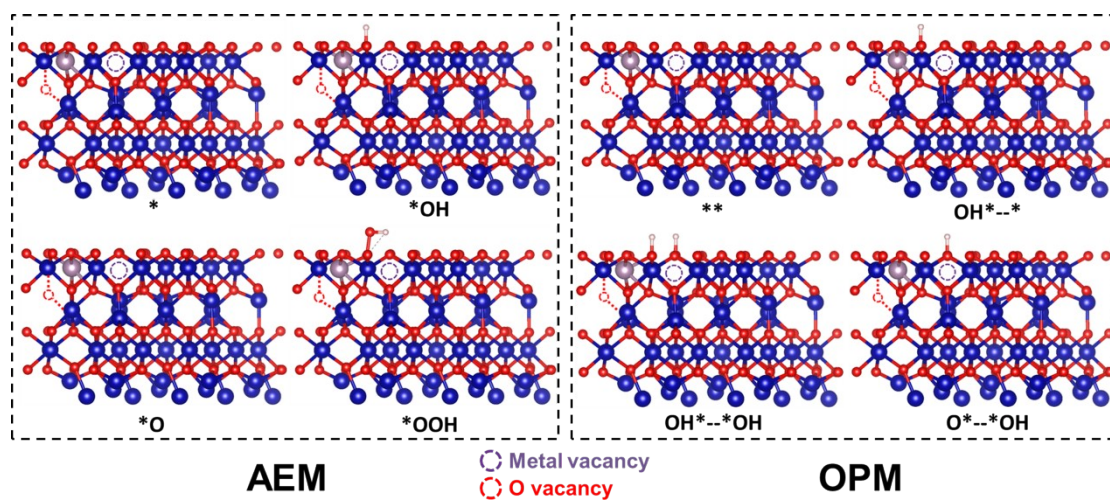

**Figure S22.** Optimized structures of key intermediates of  $V_O\text{-Mo}_x\text{Co}_{3-x}\text{O}_4$  for the AEM and OPM in the OER process

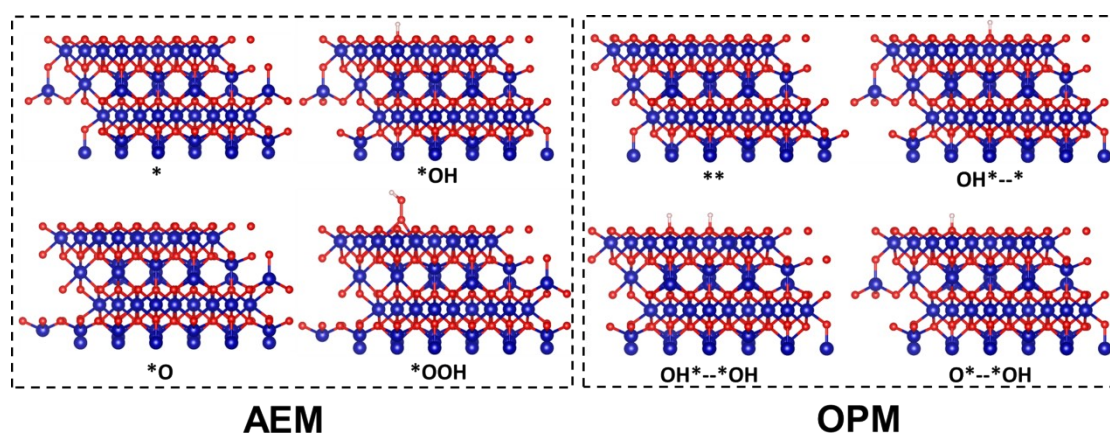

**Figure S23.** Optimized structures of key intermediates of  $\text{Co}_3\text{O}_4$  for the AEM and OPM in the OER process

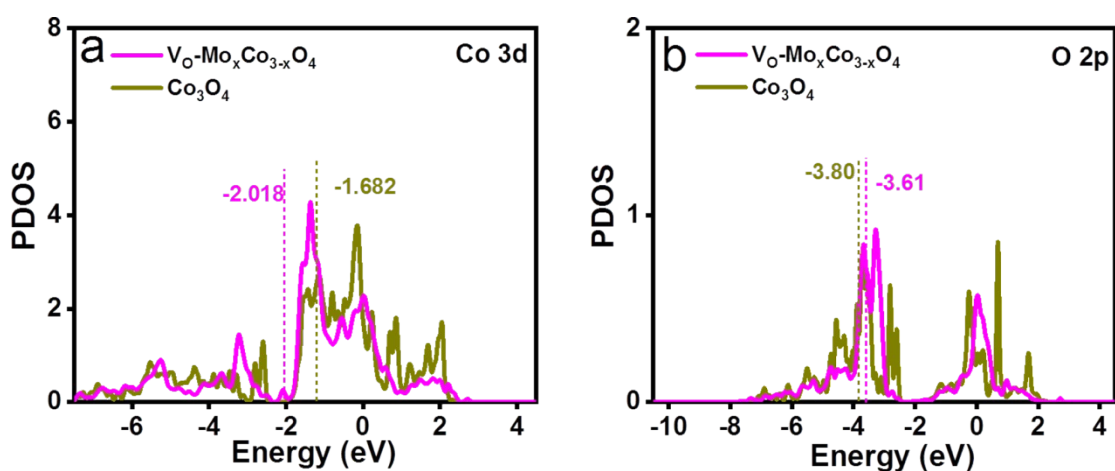

**Figure S24.** (a) Comparison of the Co  $3d$ -band center of  $V_O\text{-Mo}_x\text{Co}_{3-x}\text{O}_4$  and  $\text{Co}_3\text{O}_4$ .  
(b) Comparison of the O  $2p$ -band center of  $V_O\text{-Mo}_x\text{Co}_{3-x}\text{O}_4$  and  $\text{Co}_3\text{O}_4$ .

## Additional Table

According to the results of XPS spectroscopy, the atomic ratio of Mo to Co in the near-surface of  $V_O\text{-Mo}_x\text{Co}_{3-x}\text{O}_4$  is obtained to be 3:247 (Table S1). Based on the result of ICP, the total atomic ratio of Mo to Co in  $V_O\text{-Mo}_x\text{Co}_{3-x}\text{O}_4$  is 1:230. Therefore, Mo cations should mainly distribute in the near-surface of  $V_O\text{-Mo}_x\text{Co}_{3-x}\text{O}_4$ .

**Table S1.** The atomic ratio of Mo to Co in the near-surface of  $V_O\text{-Mo}_x\text{Co}_{3-x}\text{O}_4$  detected from XPS spectroscopy.

| Element | Element Atomic % |
|---------|------------------|
| Co      | 98.77            |
| Mo      | 1.23             |

**Table S2.** Fitting parameters in the Co K-edge EXAFS for  $V_O\text{-Mo}_x\text{Co}_{3-x}\text{O}_4$  and  $\text{Co}_3\text{O}_4$ .

| Sample                                     | Shell                                | CN <sup>a</sup> | R( $\text{\AA}$ ) <sup>b</sup> | $\sigma^2(\text{\AA}^2)$ <sup>c</sup> | $\Delta E_0(\text{eV})$ <sup>d</sup> | R-factor |
|--------------------------------------------|--------------------------------------|-----------------|--------------------------------|---------------------------------------|--------------------------------------|----------|
| $V_O\text{-Mo}_x\text{Co}_{3-x}\text{O}_4$ | Co <sub>oct</sub> -O                 | 4.122           | 1.880                          | 0.00029                               | -5.99741                             | 0.00715  |
|                                            | Co <sub>td</sub> -O                  | 5.375           | 1.994                          | 0.00218                               |                                      |          |
|                                            | Co <sub>oct</sub> -TM <sub>oct</sub> | 5.598           | 2.869                          | 0.00634                               |                                      |          |
|                                            | Co <sub>td</sub> -TM <sub>oct</sub>  | 9.982           | 3.361                          | 0.00628                               |                                      |          |
|                                            | Co <sub>td</sub> -TM <sub>td</sub>   | 4.086           | 3.504                          | 0.00008                               |                                      |          |
| $\text{Co}_3\text{O}_4$                    | Co <sub>oct</sub> -O                 | 4.107           | 1.824                          | 0.00455                               | -6.05066                             | 0.00110  |
|                                            | Co <sub>td</sub> -O                  | 6.160           | 1.953                          | 0.00038                               |                                      |          |
|                                            | Co <sub>oct</sub> -Co <sub>oct</sub> | 6.257           | 2.861                          | 0.00628                               |                                      |          |
|                                            | Co <sub>td</sub> -Co <sub>oct</sub>  | 10.859          | 3.365                          | 0.00500                               |                                      |          |
|                                            | Co <sub>td</sub> -Co <sub>td</sub>   | 4.125           | 3.518                          | 0.00361                               |                                      |          |

As shown in Table S3, it should be noted that most of these state-of-the-art non-precious metal electrocatalysts were tested in electrolytes with a pH value of 0 (1.0 M HClO<sub>4</sub> or 0.5 M H<sub>2</sub>SO<sub>4</sub>), while we adopted an electrolyte of 0.1 M HClO<sub>4</sub> (pH=1) for the measurements. This is because the pH value in the working environment of a PEMWE is close to pH=1.<sup>S26</sup>

**Table S3.** The activity and kinetics of currently documented state-of-the-art non-precious metal electrocatalysts for acidic OER.

| Electrocatalyst                            | Electrolyte             | Tafel slope (mV dec <sup>-1</sup> ) | $\eta$ (mV) @ 10 mA cm <sup>-1</sup> | Reference        |
|--------------------------------------------|-------------------------|-------------------------------------|--------------------------------------|------------------|
| $V_O\text{-Mo}_x\text{Co}_{3-x}\text{O}_4$ | 0.1 M HClO <sub>4</sub> | 102.5                               | 420                                  | <i>This work</i> |

|                                                    |                                       |      |     |                                                         |
|----------------------------------------------------|---------------------------------------|------|-----|---------------------------------------------------------|
| 90-Co-MnO <sub>2</sub>                             | 0.1 M HClO <sub>4</sub>               | 158  | 901 | <i>Adv. Mater.</i> <b>2023</b> , 35, 2207066            |
| Co <sub>3</sub> O <sub>4</sub> @rGO/CP             | 0.5 M H <sub>2</sub> SO <sub>4</sub>  | 121  | 380 | <i>Chem. Eng. J.</i> <b>2023</b> , 451, 138471.         |
| Co <sub>3</sub> O <sub>4</sub> -CoMoO <sub>4</sub> | 0.5 M H <sub>2</sub> SO <sub>4</sub>  | 87.8 | 410 | <i>Chem. Eng. J.</i> <b>2023</b> , 473, 145353          |
| Co <sub>3-x</sub> Ba <sub>x</sub> O <sub>4</sub>   | 1 M HClO <sub>4</sub>                 | 30   | 281 | <i>J. Am. Chem. Soc.</i> <b>2023</b> , 145, 7829        |
| Co <sub>2</sub> MnO <sub>4</sub> /FTO              | 0.05 M H <sub>2</sub> SO <sub>4</sub> | 79.6 | 395 | <i>Nat. Catal.</i> <b>2022</b> , 5, 109                 |
| Co <sub>3</sub> O <sub>4</sub> @C/GPO              | 1 M H <sub>2</sub> SO <sub>4</sub>    | 143  | 360 | <i>Nat. Commun.</i> <b>2022</b> , 13, 4341              |
| Fe-Co <sub>3</sub> O <sub>4</sub> @C/FTO           | 0.5 M H <sub>2</sub> SO <sub>4</sub>  | 68.6 | 396 | <i>Appl. Catal. B Environ</i> <b>2022</b> , 303, 120899 |
| Co <sub>3</sub> O <sub>4</sub> /CeO <sub>2</sub>   | 0.5 M H <sub>2</sub> SO <sub>4</sub>  | 88.1 | 423 | <i>Nat. Commun.</i> <b>2021</b> , 12, 3036              |
| P-Co <sub>3</sub> O <sub>4</sub> /GC               | 0.1 M HClO <sub>4</sub>               | 98   | 400 | <i>J. Colloid Interface Sci.</i> <b>2023</b> , 641, 329 |
| Co <sub>3</sub> O <sub>4</sub> @N-C/FTO            | 0.5 M H <sub>2</sub> SO <sub>4</sub>  | 152  | 465 | <i>J. Colloid Interface Sci.</i> <b>2022</b> , 623, 327 |

**Table S4.** R<sub>s</sub> and R<sub>ct</sub> were obtained by fitting the Nyquist plot of Co<sub>3</sub>O<sub>4</sub> and V<sub>O</sub>-Mo<sub>x</sub>Co<sub>3-x</sub>O<sub>4</sub> at 1.7 vs. RHE.

| Electrocatalyst                                                  | R <sub>s</sub> (Ω) | R <sub>ct</sub> (Ω) |
|------------------------------------------------------------------|--------------------|---------------------|
| V <sub>O</sub> -Mo <sub>x</sub> Co <sub>3-x</sub> O <sub>4</sub> | 1.31               | 1.26                |
| Co <sub>3</sub> O <sub>4</sub>                                   | 1.34               | 2.40                |

Most reported electrocatalysts (including precious metal based electrocatalysts) are usually only able to stably catalyze the acidic OER for a few tens of hours (Table R3). The as-prepared V<sub>O</sub>-Mo<sub>x</sub>Co<sub>3-x</sub>O<sub>4</sub> is at a similar level compared with the current reported state-of-the-art electrocatalysts in stability for acidic OER.

**Table S5.** Comparisons of stability for acidic OER on reported state-of-the-art Co-based electrocatalysts

| Electrocatalyst | Electrolyte | Stability | Reference |
|-----------------|-------------|-----------|-----------|
|-----------------|-------------|-----------|-----------|

|                                                                  |                                      |                                                                               |                                                                        |
|------------------------------------------------------------------|--------------------------------------|-------------------------------------------------------------------------------|------------------------------------------------------------------------|
| V <sub>O</sub> -Mo <sub>x</sub> Co <sub>3-x</sub> O <sub>4</sub> | 0.1 M HClO <sub>4</sub>              | Maintaining 10 mA cm <sup>-2</sup><br>for 30 h                                | <i>This work</i>                                                       |
| Ir <sub>lat</sub> @Co <sub>3</sub> O <sub>4</sub>                | 0.5 M H <sub>2</sub> SO <sub>4</sub> | Maintaining 98.3% of activity<br>@10 mA cm <sup>-2</sup> after 12 h           | <i>J. Energy Chem.</i><br><b>2024</b> , 89, 355                        |
| Ru <sub>(anc)</sub> -Co <sub>3</sub> O <sub>4</sub>              | 0.5 M H <sub>2</sub> SO <sub>4</sub> | Maintaining 10 mA cm <sup>-2</sup><br>for 150 h                               | <i>J. Am. Chem. Soc.</i><br><b>2023</b> , 145, 23659                   |
| Co-Co<br>DASs/ZCC                                                | 0.5 M H <sub>2</sub> SO <sub>4</sub> | Maintaining 10 mA cm <sup>-2</sup><br>for 40 h                                | <i>Angew. Chem. Int.</i><br><i>Ed.</i> <b>2023</b> , 62,<br>e202314185 |
| Ru-Co <sub>3</sub> O <sub>4</sub>                                | 0.5 M H <sub>2</sub> SO <sub>4</sub> | Maintaining 10 mA cm <sup>-2</sup><br>for 16.5 h                              | <i>J. Mater. Chem. A</i> ,<br><b>2023</b> , 11, 21767                  |
| Co <sub>3</sub> O <sub>4</sub> /CoRuO <sub>x</sub>               | 0.1 M HClO <sub>4</sub>              | Maintaining 10 mA cm <sup>-2</sup><br>for 36 h                                | <i>Small</i> <b>2023</b> , 19,<br>2204889                              |
| Co <sub>3-x</sub> Ba <sub>x</sub> O <sub>4</sub>                 | 0.5 M H <sub>2</sub> SO <sub>4</sub> | Maintaining 10 mA cm <sup>-2</sup><br>for 110 h                               | <i>J. Am. Chem. Soc.</i><br><b>2023</b> , 145, 7829                    |
| LaMn@Co-ZIF                                                      | 0.1 M HClO <sub>4</sub>              | Maintaining 10 mA cm <sup>-2</sup><br>for 353 h                               | <i>Science</i> <b>2023</b> , 380,<br>609                               |
| Ir-Co <sub>3</sub> O <sub>4</sub>                                | 0.5 M H <sub>2</sub> SO <sub>4</sub> | Maintaining 10 mA cm <sup>-2</sup><br>for 30 h                                | <i>Nat. Commun.</i><br><b>2022</b> , 13, 7754                          |
| Co <sub>3</sub> O <sub>4</sub> @C/GPO                            | 1 M H <sub>2</sub> SO <sub>4</sub>   | Maintaining 10 mA cm <sup>-2</sup><br>for 43 h                                | <i>Nat. Commun.</i><br><b>2022</b> , 13, 4341                          |
| Co <sub>3</sub> O <sub>4</sub> /CeO <sub>2</sub>                 | 0.5 M H <sub>2</sub> SO <sub>4</sub> | Potential to maintain 10 mA<br>cm <sup>-2</sup> increases by 60 mV in 50<br>h | <i>Nat. Commun.</i><br><b>2021</b> , 12, 3036                          |

## References

- S1 B. Ravel and M. Newville, *J. Synchrotron Radiat.*, 2005, **12**, 537-541.
- S2 S. I. Zabinsky, J. J. Rehr, A. Ankudinov, R. C. Albers and M. J. Eller, *Physical Review B*, 1995, **52**, 2995-3009.
- S3 G. Kresse and D. Joubert, *Physical Review B*, 1999, **59**, 1758-1775.

- S4 J. P. Perdew, K. Burke and M. Ernzerhof, *Phys. Rev. Lett.*, 1996, **77**, 3865-3868.
- S5 S. Grimme, J. Antony, S. Ehrlich and H. Krieg, *J. Chem. Phys.*, 2010, **132**, 154104.
- S6 H. You, D. Wu, D. Si, M. Cao, F. Sun, H. Zhang, H. Wang, T.-F. Liu and R. Cao, *J. Am. Chem. Soc.*, 2022, **144**, 9254-9263.
- S7 C. Lin, J.-L. Li, X. Li, S. Yang, W. Luo, Y. Zhang, S.-H. Kim, D.-H. Kim, S. S. Shinde, Y.-F. Li, Z.-P. Liu, Z. Jiang and J.-H. Lee, *Nat. Catal.*, 2021, **4**, 1012-1023.
- S8 S. Zhao, Z. Wang, H. Kang, W. Zhang, J. Li, S. Zhang, L. Li and A. Huang, *Chem. Eng. J.*, 2019, **359**, 275-284.
- S9 G. Solomon, A. Landström, R. Mazzaro, M. Jugovac, P. Moras, E. Cattaruzza, V. Morandi, I. Concina and A. Vomiero, *Adv. Energy Mater.*, 2021, **11**, 2101324.
- S10 J. Lv, L. Wang, R. Li, K. Zhang, D. Zhao, Y. Li, X. Li, X. Huang and G. Wang, *ACS Catal.*, 2021, **11**, 14338-14351.
- S11 L. Lv, D. Zha, Y. Ruan, Z. Li, X. Ao, J. Zheng, J. Jiang, H. M. Chen, W.-H. Chiang, J. Chen and C. Wang, *ACS Nano*, 2018, **12**, 3042-3051.
- S12 Y. Fang, Y. Xue, Y. Li, H. Yu, L. Hui, Y. Liu, C. Xing, C. Zhang, D. Zhang, Z. Wang, X. Chen, Y. Gao, B. Huang and Y. Li, *Angew. Chem. Int. Ed.*, 2020, **59**, 13021-13027.
- S13 M. Zang, N. Xu, G. Cao, Z. Chen, J. Cui, L. Gan, H. Dai, X. Yang and P. Wang, *ACS Catal.*, 2018, **8**, 5062-5069.
- S14 L. Zhuang, L. Ge, Y. Yang, M. Li, Y. Jia, X. Yao and Z. Zhu, *Adv. Mater.*, 2017, **29**, 1606793.
- S15 J. Bao, X. Zhang, B. Fan, J. Zhang, M. Zhou, W. Yang, X. Hu, H. Wang, B. Pan and Y. Xie, *Angew. Chem. Int. Ed.*, 2015, **54**, 7399-7404.
- S16 A. Sivanantham, P. Ganesan and S. Shanmugam, *Adv. Funct. Mater.*, 2016, **26**, 4661-4672.
- S17 Y. Zhu, J. Wang, T. Koketsu, M. Kroschel, J. M. Chen, S. Y. Hsu, G. Henkelman, Z. Hu, P. Strasser and J. Ma, *Nat. Commun.*, 2022, **13**, 7754.
- S18 L. Chong, G. Gao, J. Wen, H. Li, H. Xu, Z. Green, J. D. Sugar, A. J. Kropf, W.

- Xu, X. M. Lin, H. Xu, L. W. Wang and D. J. Liu, *Science*, 2023, **380**, 609-616.
- S19 R. Chen, Z. Wang, S. Chen, W. Wu, Y. Zhu, J. Zhong and N. Cheng, *ACS Energy Lett.*, 2023, **8**, 3504-3511.
- S20 Y. Peng, C. Huang, J. Huang, M. Feng, X. Qiu, X. Yue and S. Huang, *Adv. Funct. Mater.*, 2022, **32**, 2201011.
- S21 Y. Zhou, S. Sun, C. Wei, Y. Sun, P. Xi, Z. Feng and Z. J. Xu, *Adv. Mater.*, 2019, **31**, e1902509.
- S22 S. Anantharaj and S. Noda, *ChemElectroChem*, 2020, **7**, 2297-2308.
- S23 Y. J. Wu, J. Yang, T. X. Tu, W. Q. Li, P. F. Zhang, Y. Zhou, J. F. Li, J. T. Li and S. G. Sun, *Angew. Chem. Int. Ed.*, 2021, **60**, 26829-26836.
- S24 A. Moysiadou, S. Lee, C. S. Hsu, H. M. Chen and X. Hu, *J. Am. Chem. Soc.*, 2020, **142**, 11901-11914.
- S25 W. H. Lee, M. H. Han, Y. J. Ko, B. K. Min, K. H. Chae and H. S. Oh, *Nat. Commun.*, 2022, **13**, 605.
- S26 H. N. Nong, T. Reier, H.-S. Oh, M. Gliech, P. Paciok, T. H. T. Vu, D. Teschner, M. Heggen, V. Petkov, R. Schlögl, T. Jones and P. Strasser, *Nat. Catal.*, 2018, **1**, 841-851.
